# Supplementary material for: Cation substitution effects (Mn, Ni, and Zn) on ZIF-67 derived spinel modified with 3DGO for the detection of NO2 gas with high sensitivity and selectivity
Source: Royal Society of Chemistry journal article supplement (doi:10.1039/d3en00205e), 2023-06-28
Supplement: d3en00205e1.pdf [file d3en00205e1.pdf]

## Supporting Information

### Cations Substitution Effects (Mn, Ni, and Zn) on ZIF-67 derived Spinel Modified with 3DGO for the Detection of NO<sub>2</sub> Gas with High Sensitivity and Selectivity

Banalata Maji<sup>a</sup>, Adyasha Das<sup>a</sup>, Bapun Barik<sup>a,b</sup>, Priyabrat Dash<sup>a\*</sup>

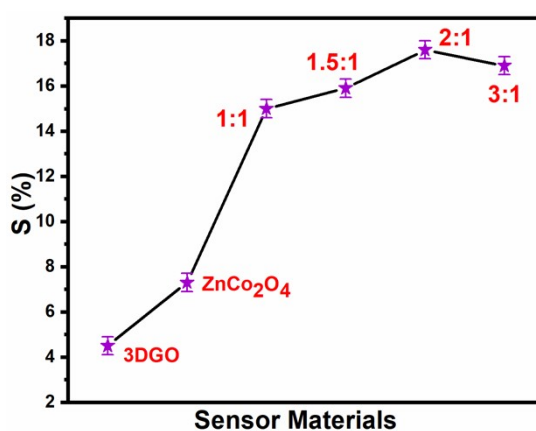

Fig. S1. Effect of 3DGO loading in the composite sensor at room temperature.

Table S1: Specific surface area and pore size of MnCo<sub>2</sub>O<sub>4</sub>, NiCo<sub>2</sub>O<sub>4</sub>, ZnCo<sub>2</sub>O<sub>4</sub> structures and 3DGO-ZnCo<sub>2</sub>O<sub>4</sub> composite.

| Materials                             | Surface Area (m <sup>2</sup> /g) | Pore size (nm) |
|---------------------------------------|----------------------------------|----------------|
| MnCo <sub>2</sub> O <sub>4</sub>      | 71                               | 2.2            |
| NiCo <sub>2</sub> O <sub>4</sub>      | 78                               | 3.8            |
| ZnCo <sub>2</sub> O <sub>4</sub>      | 87                               | 4.3            |
| 3DGO-ZnCo <sub>2</sub> O <sub>4</sub> | 138                              | 6.7            |

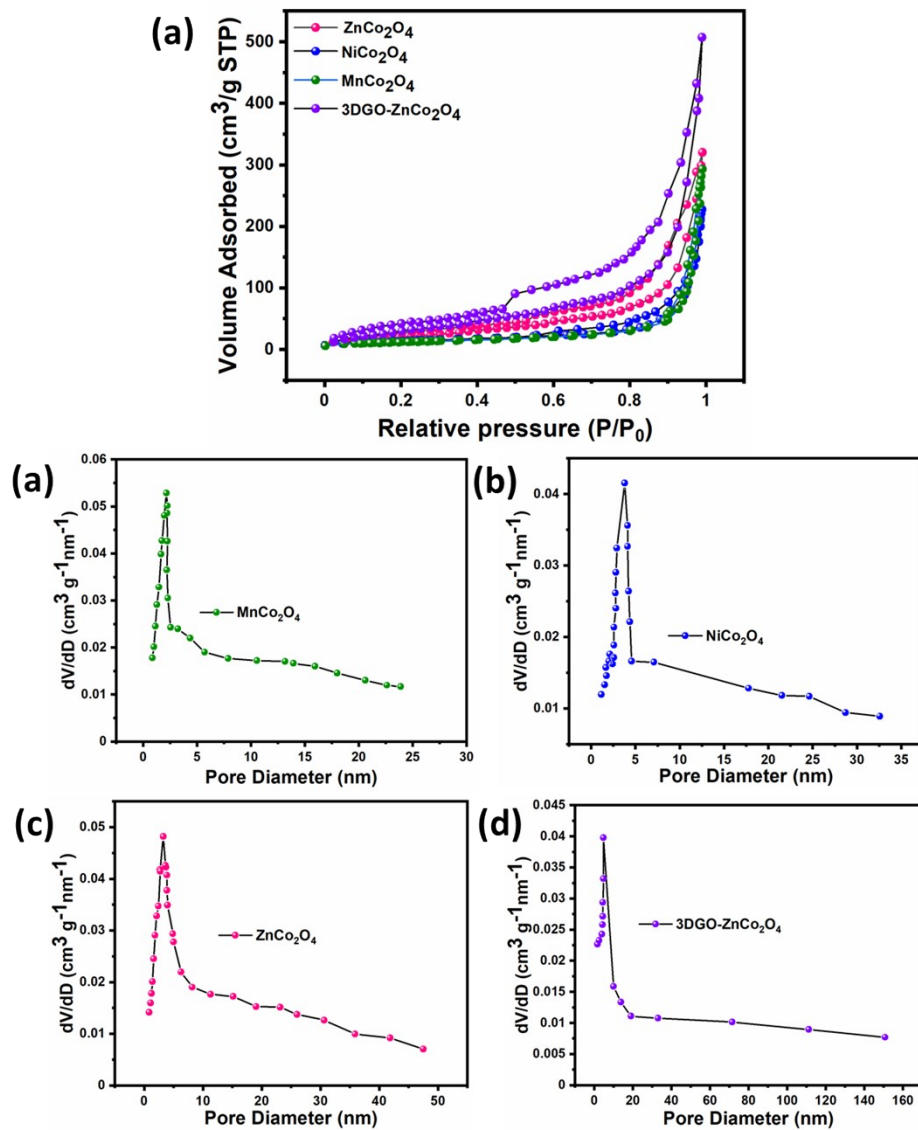

**Fig. S2.** N<sub>2</sub> adsorption-desorption study and pore size distribution curves of MnCo<sub>2</sub>O<sub>4</sub>, NiCo<sub>2</sub>O<sub>4</sub>, ZnCo<sub>2</sub>O<sub>4</sub> structures and 3DGO-ZnCo<sub>2</sub>O<sub>4</sub> composite.

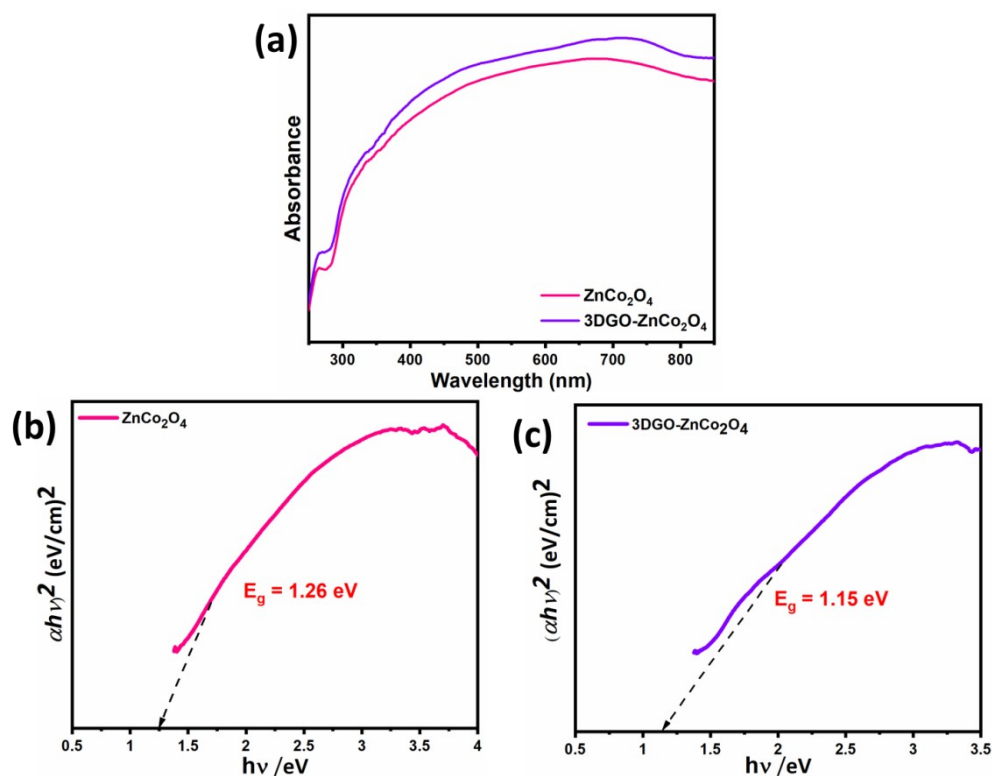

**Fig. S3.** (a-d) (a) UV-visible absorption spectra, and Tauc plot between  $(\alpha h\nu)^2$  vs. photon energy ( $h\nu$ ), of the ZnCo<sub>2</sub>O<sub>4</sub> and 3DGO-ZnCo<sub>2</sub>O<sub>4</sub> respectively.

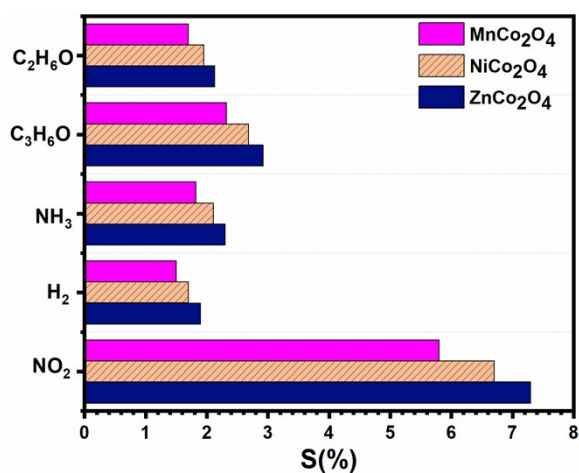

**Fig. S4.** Cross-selectivity of MnCo<sub>2</sub>O<sub>4</sub>, NiCo<sub>2</sub>O<sub>4</sub>, and ZnCo<sub>2</sub>O<sub>4</sub> samples towards various gases.

**Table S2.** Comparison of different materials based sensor for nitrogen dioxide sensing applications.

| Sl No. | Gas sensors                                | Operating temperature (°C) | Conc. of gas | Sensitivity (%) | Response/ Recovery Time | Ref |
|--------|--------------------------------------------|----------------------------|--------------|-----------------|-------------------------|-----|
| 1      | Co <sub>3</sub> O <sub>4</sub> /rGO        | RT                         | 60 ppm       | 5               | 60 s/120 s              | 1   |
| 2      | ZnGa <sub>2</sub> O <sub>4</sub> /Graphene | RT                         | 100 ppm      | 9.8             | 32 s/41 s               | 2   |
| 3      | SnO <sub>2</sub> /rGO                      | RT                         | 100 ppm      | 1.05            | 300 s                   | 3   |

|    |                                                                        |        |         |       |              |            |
|----|------------------------------------------------------------------------|--------|---------|-------|--------------|------------|
| 4  | p-NiCo <sub>2</sub> O <sub>4</sub> /n-WO <sub>3</sub>                  | 150 °C | 20 ppm  | 11.6  | 13 s/16 s    | 4          |
| 5  | MOF-derived porous NiFe <sub>2</sub> O <sub>4</sub>                    | 120 °C | 200 ppm | 14.27 | 32 s/ 31 s   | 5          |
| 6  | In-SnO <sub>2</sub> -rGO                                               | RT     | 100 ppm | 11    | 400 s/-      | 6          |
| 7  | hmc Co <sub>3</sub> O <sub>4</sub> -g-C <sub>3</sub> N <sub>4</sub> NC | RT     | 60 ppm  | 17.83 | 10 s/26.6 s  | 7          |
| 8  | In <sub>2</sub> O <sub>3</sub> /rGO                                    | RT     | 30 ppm  | 8.25  | 240 s/1440 s | 8          |
| 9  | rGO-CNT-SnO <sub>2</sub>                                               | 50 °C  | 5 ppm   | 2.53  | 8 s/77 s     | 9          |
| 10 | CoFe <sub>2</sub> O <sub>4</sub>                                       | 150 °C | 80 ppm  | 70    | 9 s/160 s    | 10         |
| 11 | Graphene Aerogel/ZnO                                                   | RT     | 100 ppm | 8.9   | 15 s/17 s    | 11         |
| 12 | 3DGO/MOF-derived ZnCo <sub>2</sub> O <sub>4</sub>                      | RT     | 50 ppm  | 17.6  | 7 s/9 s      | This study |

## References

1. N. Chen, X. Li, X. Wang, J. Yu, J. Wang, Z. Tang and S. A. Akbar, Enhanced room temperature sensing of Co<sub>3</sub>O<sub>4</sub>-intercalated reduced graphene oxide based gas sensors. *Sensors and Actuators B: Chemical*, 2013, **188**, 902-908.
2. V. Munusami, K. Arutselvan and S. Vadivel, Development of high sensitivity LPG and NO<sub>2</sub> gas sensor based ZnGa<sub>2</sub>O<sub>4</sub>/graphene nanoplates hybrid structure-A novel approach. *Diamond and Related Materials*, 2021, **111**, 108167.
3. L. Li, S. He, M. Liu, C. Zhang and W. Chen, Three-dimensional mesoporous graphene aerogel-supported SnO<sub>2</sub> nanocrystals for high-performance NO<sub>2</sub> gas sensing at low temperature. *Analytical chemistry*, 2015, **87**, 1638-1645.
4. Y. Hu, T. Li, J. Zhang, J. Guo, W. Wang and D. Zhang, High-sensitive NO<sub>2</sub> sensor based on p-NiCo<sub>2</sub>O<sub>4</sub>/n-WO<sub>3</sub> heterojunctions. *Sensors and Actuators B: Chemical*, 2022, **352**, 130912.
5. N. Liu, X. F. Wang, G. Zhang, H. Liang, T. Li, Y. Zhao, T. Zhang, Z. Tan and X. Z. Song, Metal–Organic Framework-Derived Porous NiFe<sub>2</sub>O<sub>4</sub> Nanoboxes for Ethyl Acetate Gas Sensors. *ACS Applied Nano Materials*, 2022, **5**, 14320-14327.
6. S. Cui, Z. Wen, E. C. Mattson, S. Mao, J. Chang, M. Weinert, C. J. Hirschmugl, M. Gajdardziska-Josifovska and J. Chen, Indium-doped SnO<sub>2</sub> nanoparticle–graphene nanohybrids: simple one-pot synthesis and their selective detection of NO<sub>2</sub>. *Journal of Materials Chemistry A*, 2013, **1**, 4462-4467.
7. M. Ullah, X. Bai, J. Chen, H. Lv, Z. Liu, Y. Zhang, J. Wang, B. Sun, L. Li and K. Shi, Metal-organic framework material derived Co<sub>3</sub>O<sub>4</sub> coupled with graphitic carbon nitride as highly sensitive NO<sub>2</sub> gas sensor at room temperature. *Colloids and Surfaces A: Physicochemical and Engineering Aspects*, 2021, **612**, 125972.
8. F. Gu, R. Nie, D. Han and Z. Wang, In<sub>2</sub>O<sub>3</sub>–graphene nanocomposite based gas sensor for selective detection of NO<sub>2</sub> at room temperature. *Sensors and Actuators B: Chemical*, 2015, **219**, 94-99.
9. S. Liu, Z. Wang, Y. Zhang, C. Zhang and T. Zhang, High performance room temperature NO<sub>2</sub> sensors based on reduced graphene oxide-multiwalled carbon nanotubes-tin oxide nanoparticles hybrids. *Sensors and Actuators B: Chemical*, 2015, **211**, 318-324.
10. A. A. Bagade, V. V. Ganbavle, S. V. Mohite, T. D. Dongale, B. B. Sinha and K. Y. Rajpure, Assessment of structural, morphological, magnetic and gas sensing properties of CoFe<sub>2</sub>O<sub>4</sub> thin films. *Journal of colloid and interface science*, 2017, **497**, 181-192.
11. X. Liu, J. Sun and X. Zhang, Novel 3D graphene aerogel–ZnO composites as efficient detection for NO<sub>2</sub> at room temperature. *Sensors and Actuators B: Chemical*, 2015, **211**, 220-226.
